# Supplementary material for: Epigenetic Regulation Mechanisms of the Cofilin-1 Gene in the Development and Differentiation of Bovine Primary Myoblasts
Source: MDPI journal article supplement (doi:10.3390/genes13050723), 2022-04-21
Supplement: s1 [file s1]

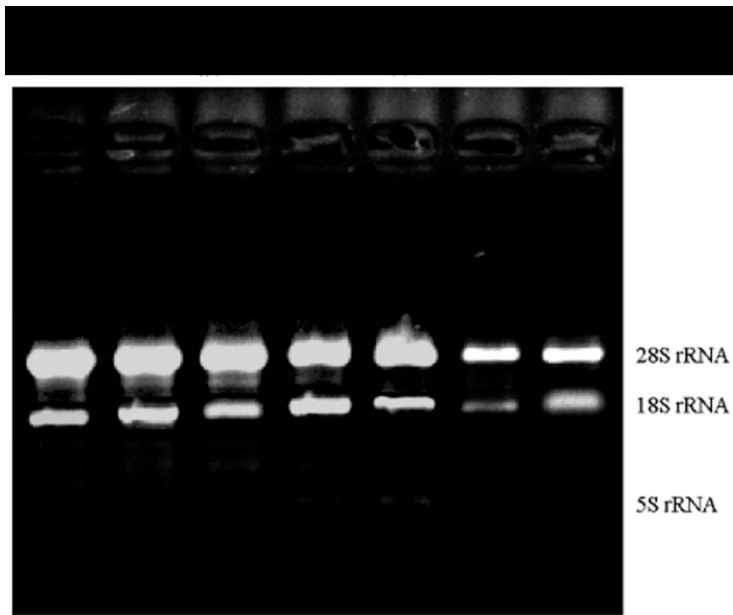

**Figure S1.** Agarose gel of electrophoresis pattern of total RNA.

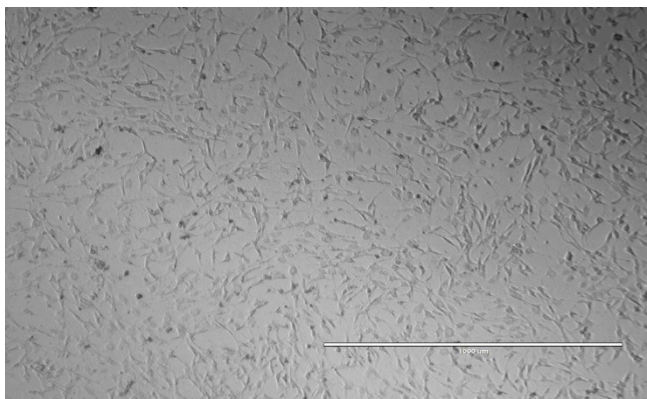

**Figure S2.** Bovine primary myoblasts ( $\times 100$ ).
